# Supplementary material for: A New Species of Terrestrial-Breeding Frog, Genus Pristimantis (Anura: Strabomantidae), from the Peruvian Yungas of Central Peru
Source: MDPI journal article supplement (doi:10.3390/taxonomy3020019), 2023-06-20
Supplement: s1 [file s1]

**Supplementary S1. Genetic distances (uncorrected p-distances) estimated from 542 bp of the non-coding 16S rRNA mitochondrial fragment between *Pristimantis clarae* and related taxa of the genus *Pristimantis* (Strabomantidae).**

|                                              | <i>P. albertus</i> MUSM33299 KY594750 | <i>P. aniptopalmatus</i> KU291627 EF493390 | <i>P. aniptopalmatus</i> NMP6V75051 KY006086 | <i>P. aniptopalmatus</i> MUSM31111 KY006082 | <i>P. aniptopalmatus</i> MUSM31130 KY006084 | <i>P. attenboroughi</i> MUSM31186 KY594752 | <i>P. bounides</i> MUSM31198 KY962794 | <i>P. bounides</i> NMP6V75097 KY962797 | <i>P. buccinator</i> EB21.13 MG820139 | <i>P. cosnipatae</i> MHNG 2606.72 MW724815 | <b><i>P. clarae</i> CORBIDI21664</b> | <i>P. danae</i> MVZ272358 KY652652 | <i>P. humboldti</i> MUSM31194 KY962798 | <i>P. humboldti</i> NMP6V75538 KY962799 | <i>P. pharangobates</i> KU173492 EF493706 | <i>P. puipui</i> NMP6V75542 KY962800 | <i>P. reichlei</i> CORBIDI16219 KY652657 | <i>P. sinschi</i> MUSM32733 MW075408 | <i>P. stictogaster</i> KU291659 EF493704 | <i>P. toftae</i> AC107.07 KY652659 |
|----------------------------------------------|---------------------------------------|--------------------------------------------|----------------------------------------------|---------------------------------------------|---------------------------------------------|--------------------------------------------|---------------------------------------|----------------------------------------|---------------------------------------|--------------------------------------------|--------------------------------------|------------------------------------|----------------------------------------|-----------------------------------------|-------------------------------------------|--------------------------------------|------------------------------------------|--------------------------------------|------------------------------------------|------------------------------------|
| <i>P. albertus</i> MUSM33299 KY594750        |                                       |                                            |                                              |                                             |                                             |                                            |                                       |                                        |                                       |                                            |                                      |                                    |                                        |                                         |                                           |                                      |                                          |                                      |                                          |                                    |
| <i>P. aniptopalmatus</i> KU291627 EF493390   | 3.70                                  |                                            |                                              |                                             |                                             |                                            |                                       |                                        |                                       |                                            |                                      |                                    |                                        |                                         |                                           |                                      |                                          |                                      |                                          |                                    |
| <i>P. aniptopalmatus</i> NMP6V75051 KY006086 | 3.91                                  | 0.22                                       |                                              |                                             |                                             |                                            |                                       |                                        |                                       |                                            |                                      |                                    |                                        |                                         |                                           |                                      |                                          |                                      |                                          |                                    |
| <i>P. aniptopalmatus</i> MUSM31111 KY006082  | 3.70                                  | 0.43                                       | 0.65                                         |                                             |                                             |                                            |                                       |                                        |                                       |                                            |                                      |                                    |                                        |                                         |                                           |                                      |                                          |                                      |                                          |                                    |
| <i>P. aniptopalmatus</i> MUSM31130 KY006084  | 3.91                                  | 0.22                                       | 0.43                                         | 0.22                                        |                                             |                                            |                                       |                                        |                                       |                                            |                                      |                                    |                                        |                                         |                                           |                                      |                                          |                                      |                                          |                                    |
| <i>P. attenboroughi</i> MUSM31186 KY594752   | 3.70                                  | 2.17                                       | 2.39                                         | 2.17                                        | 1.96                                        |                                            |                                       |                                        |                                       |                                            |                                      |                                    |                                        |                                         |                                           |                                      |                                          |                                      |                                          |                                    |
| <i>P. bounides</i> MUSM31198 KY962794        | 5.00                                  | 1.74                                       | 1.96                                         | 1.74                                        | 1.52                                        | 2.61                                       |                                       |                                        |                                       |                                            |                                      |                                    |                                        |                                         |                                           |                                      |                                          |                                      |                                          |                                    |
| <i>P. bounides</i> NMP6V75097 KY962797       | 5.22                                  | 1.96                                       | 2.17                                         | 1.96                                        | 1.74                                        | 2.83                                       | 0.22                                  |                                        |                                       |                                            |                                      |                                    |                                        |                                         |                                           |                                      |                                          |                                      |                                          |                                    |
| <i>P. buccinator</i> EB21.13 MG820139        | 11.52                                 | 11.09                                      | 11.30                                        | 11.52                                       | 11.30                                       | 10.87                                      | 12.39                                 | 12.39                                  |                                       |                                            |                                      |                                    |                                        |                                         |                                           |                                      |                                          |                                      |                                          |                                    |
| <i>P. cosnipatae</i> MHNG 2606.72 MW724815   | 5.43                                  | 4.35                                       | 4.57                                         | 4.35                                        | 4.13                                        | 3.48                                       | 4.35                                  | 4.57                                   | 11.52                                 |                                            |                                      |                                    |                                        |                                         |                                           |                                      |                                          |                                      |                                          |                                    |
| <b><i>P. clarae</i> CORBIDI21664</b>         | 4.57                                  | <b>1.74</b>                                | <b>1.96</b>                                  | <b>1.74</b>                                 | <b>1.52</b>                                 | 2.61                                       | <b>1.74</b>                           | <b>1.96</b>                            | 12.17                                 | 4.78                                       |                                      |                                    |                                        |                                         |                                           |                                      |                                          |                                      |                                          |                                    |
| <i>P. danae</i> MVZ272358 KY652652           | 6.96                                  | 5.87                                       | 6.09                                         | 5.87                                        | 5.65                                        | 5.43                                       | 5.87                                  | 6.09                                   | 12.61                                 | 6.52                                       | 6.52                                 |                                    |                                        |                                         |                                           |                                      |                                          |                                      |                                          |                                    |
| <i>P. humboldti</i> MUSM31194 KY962798       | 4.35                                  | 1.09                                       | 1.30                                         | 1.09                                        | 0.87                                        | 1.96                                       | 0.65                                  | 0.87                                   | 11.74                                 | 3.70                                       | <b>1.09</b>                          | 5.43                               |                                        |                                         |                                           |                                      |                                          |                                      |                                          |                                    |
| <i>P. humboldti</i> NMP6V75538 KY962799      | 4.57                                  | 1.30                                       | 1.52                                         | 1.30                                        | 1.09                                        | 2.17                                       | 0.87                                  | 1.09                                   | 11.96                                 | 3.70                                       | <b>1.30</b>                          | 5.65                               | 0.22                                   |                                         |                                           |                                      |                                          |                                      |                                          |                                    |
| <i>P. pharangobates</i> KU173492 EF493706    | 4.57                                  | 3.48                                       | 3.70                                         | 3.48                                        | 3.26                                        | 2.61                                       | 3.26                                  | 3.48                                   | 10.87                                 | 2.83                                       | 3.91                                 | 5.43                               | 2.83                                   | 3.04                                    |                                           |                                      |                                          |                                      |                                          |                                    |
| <i>P. puipui</i> NMP6V75542 KY962800         | 5.22                                  | 3.04                                       | 3.26                                         | 3.04                                        | 2.83                                        | 2.39                                       | 3.04                                  | 3.26                                   | 12.17                                 | 4.13                                       | 3.48                                 | 6.09                               | 2.61                                   | 2.83                                    | 2.83                                      |                                      |                                          |                                      |                                          |                                    |
| <i>P. reichlei</i> CORBIDI16219 KY652657     | 7.83                                  | 7.83                                       | 8.04                                         | 7.83                                        | 7.61                                        | 7.39                                       | 7.61                                  | 7.83                                   | 13.70                                 | 8.91                                       | 7.83                                 | 8.91                               | 7.61                                   | 7.83                                    | 7.39                                      | 6.74                                 |                                          |                                      |                                          |                                    |
| <i>P. sinschi</i> MUSM32733 MW075408         | 11.52                                 | 10.65                                      | 10.87                                        | 10.22                                       | 10.43                                       | 10.65                                      | 11.52                                 | 11.74                                  | 11.96                                 | 11.96                                      | 11.09                                | 12.39                              | 11.30                                  | 11.52                                   | 10.65                                     | 11.52                                | 14.13                                    |                                      |                                          |                                    |
| <i>P. stictogaster</i> KU291659 EF493704     | 3.91                                  | 3.04                                       | 2.83                                         | 2.61                                        | 2.83                                        | 2.17                                       | 3.04                                  | 3.26                                   | 11.74                                 | 4.57                                       | 3.48                                 | 6.30                               | 2.83                                   | 3.04                                    | 3.91                                      | 3.70                                 | 8.04                                     | 10.87                                |                                          |                                    |
| <i>P. toftae</i> AC107.07 KY652659           | 5.43                                  | 4.13                                       | 4.35                                         | 4.35                                        | 4.13                                        | 3.48                                       | 4.13                                  | 4.35                                   | 10.87                                 | 5.43                                       | 4.78                                 | 6.96                               | 4.13                                   | 4.35                                    | 4.13                                      | 3.48                                 | 7.39                                     | 10.87                                | 3.91                                     |                                    |
